# Supplementary material
Source: Springer Nature journal article supplement (https://www.springermedizin.de/resource/supplementary/12888_2013_1333_MOESM1_ESM.pdf/9479890)
Supplement: MOESM1 [file 9479890]

False belief  
command trials

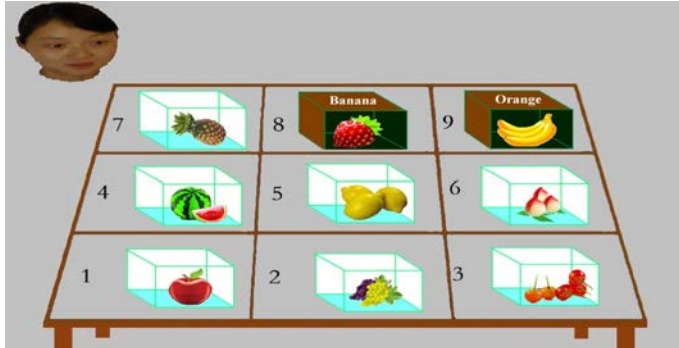

Please choose which box contains the banana.

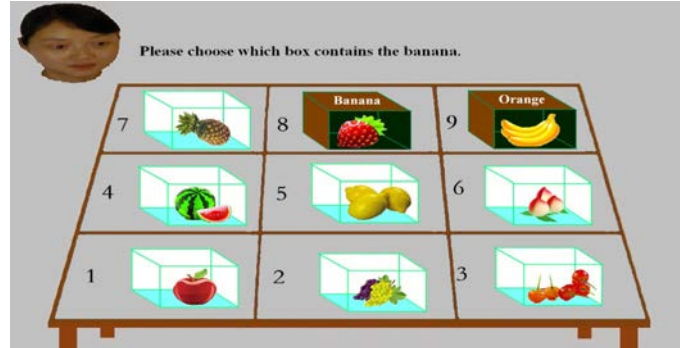

Reality  
command trials

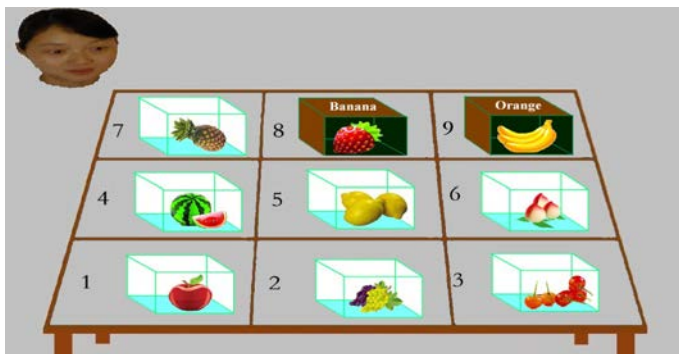

Please choose which box contains the apple.

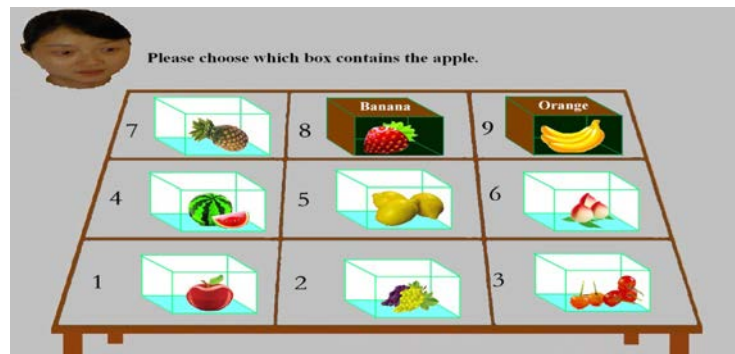

Duration=1000ms

Maximum Response Time=20000ms
